# Supplementary material
Source: PubMed Central journal article supplement (PMC3127926)
Supplement: 1015447108_pnas.201015447SI.pdf [file 1015447108_pnas.201015447SI.pdf]

# Supporting Information

Tanaka et al. 10.1073/pnas.1015447108

## SI Materials and Methods

**Generation of *Tdrd7* and *Tdrd6* Gene-Targeted Mice.** The *Tdrd7* gene-targeting vector was constructed using a BAC recombining system (kindly provided by Neal G. Copeland, National Cancer Institute, Bethesda, MD) (1, 2) with BAC clone RP23-19008 (BACPAC Resource Center). A *LoxP* site was inserted upstream of *Tdrd7* exon 8, and a *pgk-neo* cassette flanked by *FRT* sites and a *loxP* site was targeted downstream of exon 12. For negative selection, a *diphtheria toxin* expression cassette was used. The targeting vector was linearized and electroporated into KY1.1 ES cells (129/B6 F1 hybrid ES cells, kindly provided by Junji Takeda, Osaka University, Osaka, Japan). G418-resistant clones were screened and five clones were identified as having homologously recombined the transgene by PCR and Southern blot analyses. Chimeric mice were produced from two recombinant ES cell clones by aggregation with C57BL/6 × DBA/2 F1 hybrid morulas or by injection into blastocysts. Male chimeras were mated with C57BL/6 females to obtain heterozygous *loxP*-floxed *Tdrd7*-targeted mice. The floxed mice were crossed with *CMV-Cre* transgenic mice (C57BL/6 strain) (3) to excise *loxP*-flanked exons 8–12. *Tdrd7* homozygous null mice were obtained by intercrossing *Tdrd7* heterozygous mice, and generations between 2 and 15 were used for the analyses in this study. The *Tdrd6* gene-targeting vector was constructed using the BAC recombining system with BAC clone RP23-283P8. The 2.6-kb genomic region in the first exon (NM\_198418, 99–2698) was replaced with a neomycin resistance gene. The targeting vector had a *diphtheria toxin* expression cassette for negative selection. The vector was linearized and electroporated into V6.5 ES cells (129/B6 F1 hybrid ES cells, kindly provided by Rudolf Jaenisch, Whitehead Institute, Massachusetts Institute of Technology, Cambridge, MA) (4). G418-resistant clones were screened by PCR and Southern blot analyses, and 10 clones were identified as having homologously recombined the transgene. Chimeric mice were produced from two recombinant ES cell clones by aggregation with C57BL/6 × DBA/2 F1 hybrid morulas or by injection into blastocysts. Male chimeras were mated with C57BL/6 females to obtain heterozygous *Tdrd6* gene-targeted mice. Homozygous targeted mice were obtained by intercrossing heterozygous mutant mice. All of the animal experiments were performed according to our institution's ethical guidelines.

**Southern Blots.** Tail genomic DNA (10 µg) was digested with restriction enzymes, electrophoresed by using an 0.8% agarose gel, and transferred onto a nylon membrane (Hybond-XL, GE). The blot was hybridized with a [ $\alpha$ -<sup>32</sup>P]dCTP-labeled genomic fragment of *Tdrd7* and *Tdrd6*, which was PCR-amplified with the primers 5'-AGAACAAGAGAAGACCTCTCCTGG-3' and 5'-CCTCAAAGCTAAGGAACCATGC-3' and 5'-AAACTGAA-CCACAGAAAGGAGGG-3' and 5'-CCAGGCAAATCAC-CCACATGTCA-3', respectively. Signals were detected by using X-ray film (Kodak).

**RT-PCR and Northern Blots.** Total RNA was extracted from tissues using the acid guanidinium phenol chloroform (AGPC) method (TRIzol, Invitrogen). For RT-PCR, 1 µg of RNA was treated with DNase I (Promega), reverse-transcribed, and used as a PCR template (High Capacity RNA-to-cDNA kit, Applied Biosystems). Quantitative RT-PCR was performed using ABI PRISM 7700 with SYBR Green PCR Master Mix (Applied Biosystems). Relative mRNA levels were determined from threshold cycles for amplification using the  $\Delta\Delta C_t$  method.  $\beta$ -Actin was used for nor-

malization and fold changes between mutants, and controls were calculated. The assays were done in triplicate wells. The primers used for *LINE1* are 5'-GGCGAAAGCAAACGTAAGA-3 and 5'-GGAGTGCTGCGTTCTGATGA-3', which amplify the 5' end of ORF1 (5). Other primer sequences used are available on request. For Northern blotting, 15 µg of total RNA was separated on a 1% formaldehyde agarose gel, transferred to nylon membrane (Hybond N+, GE), and probed with a 4.2-kb fragment of *LINE1* 5' UTR (6) labeled with [ $\alpha$ -<sup>32</sup>P]dCTP. Signals were detected by using X-ray film (Kodak).

**Western Blots.** Tissue/cell lysates were subjected to 5–20% gradient SDS/PAGE and transferred onto nitrocellulose membranes (Protran BA, Schleicher & Schuell). The blots were probed with primary antibodies followed by alkaline phosphatase-conjugated secondary antibodies (Dako). The primary antibodies against TDRD1, -6, -7 (7, 8), and LINE1 ORF1 protein (kindly provided by Sandra L. Martin) (9) are as described previously. Anti-MILI (Abcam), DDX6 (Bethyl), RPS6 (Novus), SYCP1, GAPDH (Chemicon),  $\beta$ -actin (Sigma), and SYCP3 (10) antibodies were also used. Signals were detected by using CDP-Star with NitroBlock II (Perkin-Elmer) and X-ray film.

**Histological and Immunohistological Examination.** For histology, tissues were fixed in Bouin's solution, embedded in paraffin wax, cut into 7-µm thick sections, and then stained with hematoxylin and eosin dyes. For immunofluorescence staining, tissues fixed with 2% paraformaldehyde (PFA) in PBS were cryo-embedded in optimal cutting temperature (OCT) compound (Sakura) and cut into 10-µm thick sections. Antibodies against TDRD1, -6, -7, and -9 (7, 8); MIWI2 (5); SYCP3 (10); LINE1 ORF1 protein (kindly provided by Sandra L. Martin, University of Colorado School of Medicine, Denver, CO) (9); GENA (kindly provided by Yoshitake Nishimune, Osaka University, Osaka, Japan) (11); TNP1 and -2 (kindly provided by W. Stephen Kistler, University of South Carolina, Columbia, SC) (12, 13); PRM1 and -2 (kindly provided by Rod Balhorn, Lawrence Livermore National Laboratory, Livermore, CA) (14, 15); and LAMP2 (ABL-93, Developmental Studies Hybridoma Bank) (16) are as described previously. Anti-MVH, MILI, PABPC1 (Abcam), Ub (MBL), MIWI, EIF4E (Cell Signaling), TIAR, EEA1, AP- $\alpha$ , GM130 (BD), LC3 (Abgent), AGO2 (Abnova), anti-phospho-histone H2A.X (Upstate, Millipore), and DDX6 (Bethyl) antibodies were also used. The secondary antibodies were Alexa 488 or Alexa 568-conjugated anti-rat, rabbit, and mouse IgGs (Invitrogen). Antigen retrieval for TDRD9 and DDX6 staining was carried out by autoclaving Bouin's-fixed paraffin sections at 120 °C for 15 min in 10 mM Tris-Cl (pH 9.0), 1 mM EDTA, and 0.01% Tween20. For anti-TNP1 and PRM1 detection, antigen retrieval was carried out by incubating 2% PFA-fixed paraffin sections at 90 °C for 20 min in sodium citrate buffer (pH 6.0). Apoptotic cells were detected by using the TUNEL method (In Situ Cell Death Detection Kit, Roche). Nuclei were counterstained with 1 µg/mL Hoechst 33258 dye (Sigma).

**Electron and Immunoelectron Microscopy.** Testes were fixed with 2% glutaraldehyde in 0.1 M phosphate buffer (pH 7.2), postfixed with 1% OsO<sub>4</sub> and 0.1 M sucrose in 0.1 M phosphate buffer, dehydrated with graded concentrations of ethanol and then embedded in epoxy resin. Semithin 1-µm sections were stained with 0.1% toluidine blue for light microscopy. Sections (70–90 nm) were placed on 150-mesh copper grids, stained with uranyl acetate

followed by lead citrate, and then examined by using an electron microscope (H7700, Hitachi). For immunoelectron microscopy of MVH and MIWI, immunoelectron microscopy was performed as reported previously (8). In brief, testes were fixed in 2% PFA and 0.02% glutaraldehyde in 0.1 M phosphate buffer (pH 7.4) and embedded in epoxy resin. Sections of 90 nm were incubated with anti-MVH (Abcam) or with anti-MIWI (Cell Signaling) antibodies, followed by 15-nm gold-labeled secondary antibody [AuroProbe EM anti-rabbit IgG (HCL) and 15 nm gold (GE Healthcare)]. After postfixation with 2% glutaraldehyde in PBS, the sections were stained with uranylacetate and lead citrate and examined by using an electron microscope (H-7650, Hitachi).

**RNA in Situ Hybridization.** Testes were fixed in 4% PFA in PBS and embedded in OCT compound (Sakura), and 8- $\mu$ m sections were cut. Sense and antisense digoxigenin (DIG)-labeled (Roche) RNA probes were transcribed from a linearized plasmid (pCRII-TOPO, Invitrogen) containing *Tnp2* (NM\_013694, 1–490). For oligo dT and dA probes, oligo(dT)20 and oligo(dA)20 oligodeoxynucleotides were end-labeled with DIG (DIG-Oligonucleotide 3'-End Labeling Kit, Roche). Signals were detected using horseradish peroxidase-conjugated anti-DIG antibody (Dako), biotinyl tyramide (Perkin-Elmer), and FITC-conjugated streptavidin (Dako). Nuclei were counterstained with 1  $\mu$ g/mL Hoechst 33258 dye (Sigma). For electron microscopy, a post-embedding technique was used as described previously (17). Briefly, testes were fixed in 4% PFA and 1% glutaraldehyde in 0.1 M phosphate buffer (pH 7.4), dehydrated, embedded in London Resin (LR) white resin (NEM), and then cut into 70- to 90-nm sections. The sections were then hybridized with DIG-labeled RNA or oligo probes as described above. Detection was carried out by using sheep anti-DIG antibody (Dako), followed by 20- or 40-nm gold particle-conjugated anti-sheep IgGs (Jackson Laboratory). The sections were stained with uranyl acetate and lead citrate and then examined using an H-7650 electron microscope.

**DNA Methylation Analysis.** For methylation-sensitive Southern blotting, 10  $\mu$ g of genomic DNAs from testes were digested with methylation-sensitive HpaII or methylation-insensitive MspI, resolved in an 0.8% agarose gel and transferred onto nylon membranes (Hybond-XL, GE). The blots were hybridized with [ $\alpha$ -<sup>32</sup>P]dCTP-labeled probe of *LINE-1* 5'-UTR (type A) (6). Bisulfite sequencing was carried out as described (18). Primers used were 5'-caggatcctaggaaattagtgtgaataggtgagagggt-3' and 5'-gtaagcttccaaacaaacacctttctcaaacactatat-3' (type Tf) (19). The amplified products were subcloned into pBluescript SK and sequenced. Germ cells were isolated from *Tdrd7*<sup>+/-</sup> and <sup>-/-</sup> testes by FACS as previously described (18). Briefly, single-cell suspensions from testes were obtained by collagenase and trypsin digestion, and the cells were fixed with 4% PFA in PBS (-), permeabilized with 0.1% TritonX-100 in PBS (-), and then immunostained with anti-TRA98/104 antibody (11), followed by Alexa 546-conjugated anti-rat IgG (Invitrogen). FACS-sorted cells were treated with proteinase K (200  $\mu$ g/mL) at 55 °C overnight, and genomic DNAs were extracted and analyzed by bisulfite sequencing as described above.

**Microarray Analysis.** For the microarray analysis, spermatids were enriched from single-cell suspensions of *Tdrd7*<sup>+/-</sup> and *Tdrd7*<sup>-/-</sup> testes that were dissociated with collagenase and trypsin digestion and separated by centrifugal elutriation (R5E, Hitachi) (20). Total RNAs were extracted using the AGPC method (TRIzol, Invitrogen) and biotinylated cRNA probes were amplified using an Illumina TotalPrep RNA Amplification Kit (Ambion). MouseWG-6 Expression Beadchips (Illumina) were hybridized and scanned according to the manufacturer's in-

struction. Data with detection *P*-values of > 0.01 were used for differential expression analyses.

**Immunoprecipitation.** RNA immunoprecipitation was carried out as described (21). Briefly, single-cell suspensions from testes were fixed by 0.1% formaldehyde for 10 min at room temperature. After addition of 0.25 M glycine for 5 min, cells were harvested and lysed with RIPA buffer (50 mM Tris-HCl pH 7.4, 1% Nonidet P-40, 0.5% Na deoxycholate, 0.05% SDS, 1 mM EDTA, and 150 mM NaCl) followed by sonication. After centrifugation, lysates were precleared with protein G-coupled magnetic beads (Invitrogen) and used for immunoprecipitation for 4 h at 4 °C. Immunoprecipitation was carried out with magnetic beads coupled with anti-TDRD7, anti-EIF4E, and anti-PABP antibodies or normal rabbit IgG as a control (Santa Cruz). The RNAs in the immunoprecipitates were reverse-crosslinked with SDS and Proteinase K at 65 °C for 1 h, extracted using the AGPC method, and then analyzed by real-time RT-PCR as described.

**Sucrose Gradient Polysome Fractionation.** Testicular extracts from *Tdrd7*<sup>+/-</sup> and *Tdrd7*<sup>-/-</sup> mice (P22) were subjected to sucrose gradient fractionation as described previously (22). Briefly, testicular lysates [20 mM Tris-Cl (pH 7.4), 150 mM KCl, 5 mM MgCl<sub>2</sub>, 2 mM DTT, 0.5% Nonidet P-40] were centrifuged at 1,000  $\times$  g at 4 °C for 10 min, and the supernatant was applied to the top of a 15–50% linear sucrose gradient. Cycloheximide (100  $\mu$ g/mL) was added to stabilize polysomes (in the absence of puromycin). Puromycin was added to a final concentration of 200  $\mu$ g/mL [20 mM Tris-Cl (pH 7.4) 500 mM KCl, 2 mM DTT, 0.5% Nonidet P-40]. The gradient was centrifuged at 150,000  $\times$  g for 3 h (Hitachi). Twenty-eight fractions (0.3 mL) were collected, and the RNAs were extracted using the AGPC method, treated by DNaseI, and reverse-transcribed as described above. Relative abundance of LINE1 and  $\beta$ -actin RNA was measured by real-time RT-PCR. Proteins were separated by SDS/PAGE, and Western blots were probed with rabbit anti-RPS6 and anti-MILI antibodies as described above.

**Protein Stability Analysis.** Single-cell suspensions from *Tdrd7*<sup>+/-</sup> and <sup>-/-</sup> testes (3 wk) were obtained by collagenase and trypsin digestion, and then the cells were resuspended in Dulbecco's Modified Eagle's Medium/Nutrient F-12 Ham medium supplemented with 10% FBS. Cycloheximide, a translation inhibitor, was added to a final concentration of 100  $\mu$ g/mL and the cells were cultured at 34 °C with 5% CO<sub>2</sub>. Equal numbers of cells were collected at 0, 3, and 6 h and then subjected to Western blot analysis. To avoid saturation of autoradiography of LINE1 ORF1 in *Tdrd7*<sup>-/-</sup> samples, a 1:10 dilution of the cell lysate was loaded for *Tdrd7*<sup>-/-</sup> samples and used for relative quantification.

**RNA Transcription and Stability Analysis.** Relative transcription was measured by metabolic labeling using the Click-iT Nascent RNA capture kit (Invitrogen) according to the manufacturer's instruction. Briefly, single-cell suspensions from *Tdrd7*<sup>+/-</sup> and *Tdrd7*<sup>-/-</sup> testes (3 wk) were prepared as described above and then cultured for 1 h in the presence of uridine analog 5-ethynyluridine (EU) at a final concentration of 1 mM, which was incorporated into newly transcribed RNA. Total RNAs were extracted by using the TRIzol reagent and then used in a copper-catalyzed click reaction with an azide-biotin, which creates biotinylated RNA. The biotin nascent transcripts were captured on streptavidin magnetic beads and then used for cDNA synthesis. Quantitative RT-PCR was performed by using StepOnePlus real-time PCR system and SYBR Green PCR Master Mix (Applied Biosystems). Relative transcript levels were determined from threshold cycles for amplification using the  $\Delta\Delta$ Ct method from triplicate wells. *18S rRNA* was used for normalization. Data were obtained from

four independent experiments. Before analyzing the *LINE1* transcription in *Tdrd7*<sup>-/-</sup> samples, we evaluated the validity of this method for testicular cells by measuring the retinoic acid response, which is a well-established model of transcriptional regulation. In the presence of retinoic acid, the transcription levels of *RARβ* and *Stra8*, both of which are direct targets of the retinoic acid pathway, were clearly up-regulated when examined by the EU metabolic labeling experiment (data available upon request), confirming that this method is useful to analyze relative transcription in spermatogenic cells.

To analyze RNA stability, single-cell suspensions from *Tdrd7*<sup>+/-</sup> and *Tdrd7*<sup>-/-</sup> testes (3 wk) were cultured in the presence of 1 mM of 5,6-dichlorobenzimidazole (DRB), which inhibits RNA polymerase II by causing premature termination of transcription. Samples were collected at 0, 3, and 6 h. RNA extraction, reverse transcription, and quantitative PCR were carried out as described. The pan-caspase inhibitor Z-VAD-FMK was used to suppress apoptosis in these culture experiments.

**Piwi-Interacting RNA (piRNA) Sequence Analysis.** Deep sequence analysis of piRNAs was carried as described (18, 23). Briefly, after clipping the linker sequence, piRNA sequences were mapped to the mouse genome (release mm8) and then used for further analysis. Annotation categories were assigned on the basis of the annotation of corresponding genomic sequences extracted from

the University of California at Santa Cruz genome browser. Nucleotide biases were calculated for piRNAs matching *LINE1* consensus. To extract piRNA clusters, the genome was scanned using a 10-kb window. To identify sequences that match the consensus for transposable elements, piRNAs were aligned to consensus sequences from the Repbase release (<http://www.gir-inst.org/>). L1\_MM (GenBank M29324) was used for *LINE1*. The analysis was carried out using “the small RNA dashboard” application server (<http://katahdin.mssm.edu/html/scripts/resources.pl>). The sequence reads (after the genome mapping) were 2,387,787 for *Tdrd7*<sup>+/-</sup> 18d; 3,038,408 for *Tdrd7*<sup>-/-</sup> 18d; 2,646,993 for *Tdrd7*<sup>+/-</sup> 6w; and 2,574,308 for *Tdrd7*<sup>-/-</sup> 6w.

**Primary Culture of Testicular Cells.** Single-cell suspensions from wild-type testes were obtained by collagenase and trypsin digestion, and then the cells were resuspended in Dulbecco's Modified Eagle's Medium/Nutrient F-12 Ham medium supplemented with 10% FBS. 5'-Methylthioadenosine (MTA), a methyltransferase inhibitor, was added to a final concentration of 500 μM and the cells were cultured at 32 °C with 5% CO<sub>2</sub>. Cultured cells were collected at 3 and 6 h and then subjected to immunostaining with anti-TDRD6, anti-TDRD7, and anti-SYCP3 antibodies. Nuclei were counterstained with 1 μg/mL Hoechst 33258 dye (Sigma).

- Lee EC, et al. (2001) A highly efficient Escherichia coli-based chromosome engineering system adapted for recombinogenic targeting and subcloning of BAC DNA. *Genomics* 73:56–65.
- Liu P, Jenkins NA, Copeland NG (2003) A highly efficient recombineering-based method for generating conditional knockout mutations. *Genome Res* 13:476–484.
- Dupé V, et al. (1997) In vivo functional analysis of the Hoxa-1 3' retinoic acid response element (3'RARE). *Development* 124:399–410.
- Eggan K, et al. (2001) Hybrid vigor, fetal overgrowth, and viability of mice derived by nuclear cloning and tetraploid embryo complementation. *Proc Natl Acad Sci USA* 98:6209–6214.
- Carmell MA, et al. (2007) MIWI2 is essential for spermatogenesis and repression of transposons in the mouse male germline. *Dev Cell* 12:503–514.
- Bourc'his D, Bestor TH (2004) Meiotic catastrophe and retrotransposon reactivation in male germ cells lacking Dnmt3L. *Nature* 431:96–99.
- Hosokawa M, et al. (2007) Tudor-related proteins TDRD1/MTR-1, TDRD6 and TDRD7/TRAP: domain composition, intracellular localization, and function in male germ cells in mice. *Dev Biol* 301:38–52.
- Chuma S, et al. (2006) Tdrd1/Mtr-1, a tudor-related gene, is essential for male germ-cell differentiation and nuage/germinal granule formation in mice. *Proc Natl Acad Sci USA* 103:15894–15899.
- Branciforte D, Martin SL (1994) Developmental and cell type specificity of LINE-1 expression in mouse testis: Implications for transposition. *Mol Cell Biol* 14:2584–2592.
- Chuma S, Nakatsuji N (2001) Autonomous transition into meiosis of mouse fetal germ cells in vitro and its inhibition by gp130-mediated signaling. *Dev Biol* 229:468–479.
- Tanaka H, et al. (1997) A germ cell-specific nuclear antigen recognized by a monoclonal antibody raised against mouse testicular germ cells. *Int J Androl* 20:361–366.
- Heidaran MA, Showman RM, Kistler WS (1988) A cytochemical study of the transcriptional and translational regulation of nuclear transition protein 1 (TP1), a major chromosomal protein of mammalian spermatids. *J Cell Biol* 106:1427–1433.
- Alfonso PJ, Kistler WS (1993) Immunohistochemical localization of spermatid nuclear transition protein 2 in the testes of rats and mice. *Biol Reprod* 48:522–529.
- Stanker LH, Wyrobek A, Balhorn R (1987) Monoclonal antibodies to human protamines. *Hybridoma* 6:293–303.
- Stanker LH, et al. (1992) Immunological evidence for a P2 protamine precursor in mature rat sperm. *Mol Reprod Dev* 33:481–488.
- Moreno RD (2003) Differential expression of lysosomal associated membrane protein (LAMP-1) during mammalian spermiogenesis. *Mol Reprod Dev* 66:202–209.
- Gomez E, et al. (1997) Type I and type II interleukin-1 receptor expression in rat, mouse, and human testes. *Biol Reprod* 56:1513–1526.
- Shoji M, et al. (2009) The TDRD9-MIWI2 complex is essential for piRNA-mediated retrotransposon silencing in the mouse male germline. *Dev Cell* 17:775–787.
- Kato Y, et al. (2007) Role of the Dnmt3 family in de novo methylation of imprinted and repetitive sequences during male germ cell development in the mouse. *Hum Mol Genet* 16:2272–2280.
- Meistrich ML, Longtin J, Brock WA, Grimes SR Jr., Mace ML (1981) Purification of rat spermatogenic cells and preliminary biochemical analysis of these cells. *Biol Reprod* 25:1065–1077.
- Kaneko S, Manley JL (2005) The mammalian RNA polymerase II C-terminal domain interacts with RNA to suppress transcription-coupled 3' end formation. *Mol Cell* 20:91–103.
- Grivna ST, Pyhtila B, Lin H (2006) MIWI associates with translational machinery and PIWI-interacting RNAs (piRNAs) in regulating spermatogenesis. *Proc Natl Acad Sci USA* 103:13415–13420.
- Aravin AA, Sachidanandam R, Girard A, Fejes-Toth K, Hannon GJ (2007) Developmentally regulated piRNA clusters implicate MILI in transposon control. *Science* 316:744–747.

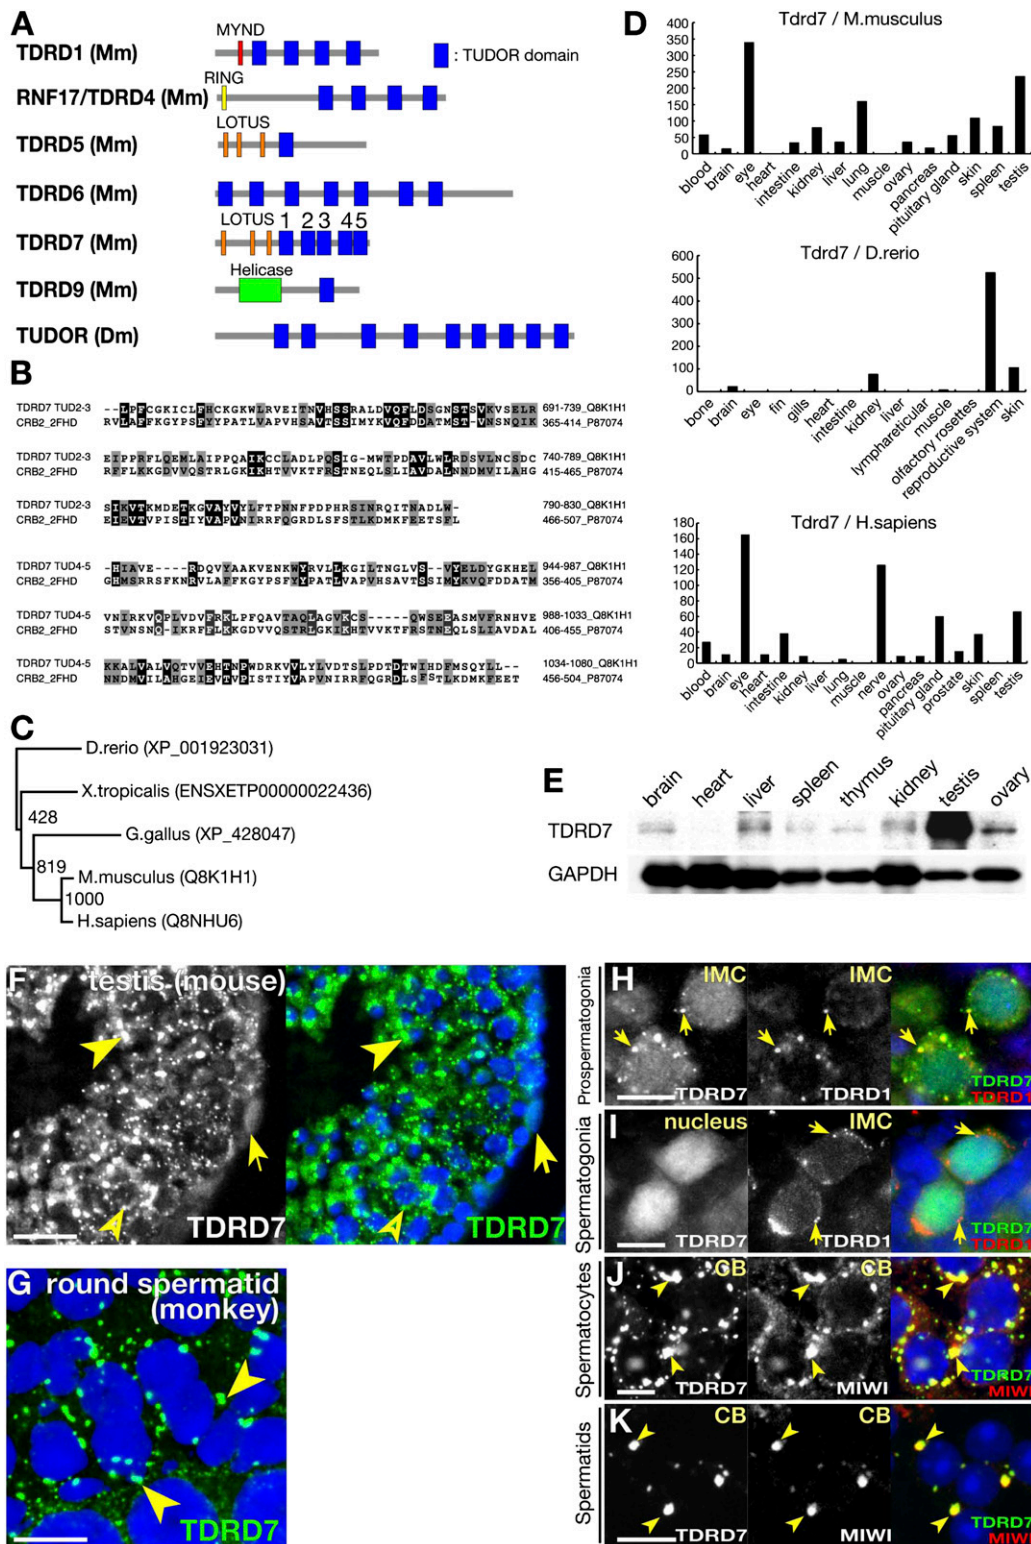

**Fig. S1.** TDRD7 is a conserved component of mammalian germinal granules. (A) Domain architecture of selected tudor proteins, mouse TDRD1, RNF17/TDRD4, TDRD5, TDRD6, TDRD7, TDRD9, and *Drosophila* TUDOR (1–6). The blue boxes represent tudor domains, and the red, yellow, orange, and green boxes are MYND, RING, LOTUS, and DEXH helicase domains, respectively. Three putative LOTUS domains with unknown function were predicted in the N-terminal region of TDRD7 (7, 8). (B) Sequence alignment of TDRD7 with a tandem Tudor domain sequence of yeast CRB2 protein (9) by ClustalW. Identical and similar residues are in reverse and shaded fonts, respectively. (C) Phylogenetic tree of TDRD7 amino acid sequences obtained from the RefSeq database (National Center for Biotechnology Information, accession numbers in parentheses; XP denotes hypothetical proteins). Multiple alignment was carried out by using ClustalW with bootstrapping ( $n = 1,000$ ) and without an out-group. The bootstrap values are shown at the nodes. (D) EST profiles of *Mus musculus*, *Danio rerio*, and *Homo sapiens* *Tdrd7* from the UniGene database (National Center for Biotechnology Information). The values are transcripts per million. *Tdrd7* transcripts were abundant in reproductive organs as well as in several somatic tissues, including the eye and nervous system. This contrasted with other *Tdrd* genes, including

Legend continued on following page





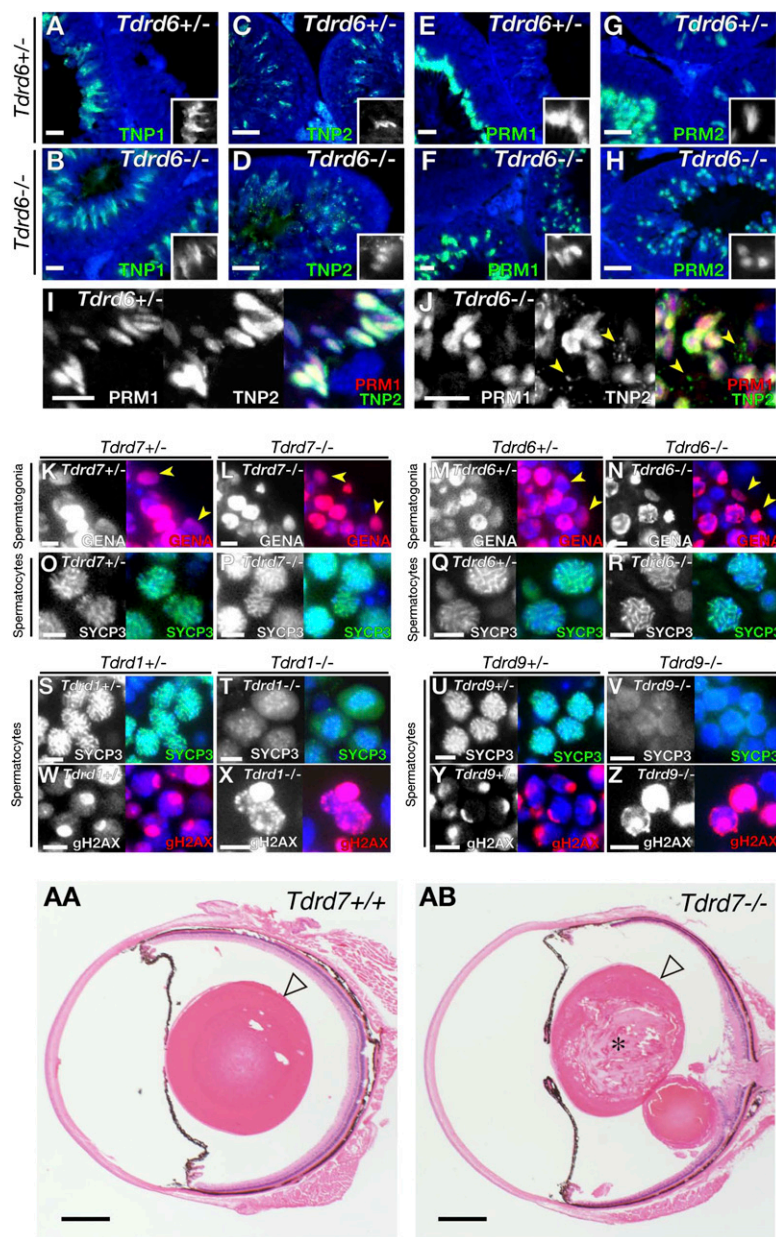

**Fig. S3.** *Tdr6*<sup>-/-</sup> and *Tdr7*<sup>-/-</sup> null phenotypes. (A–H) Immunostain of *Tdr6*<sup>+/-</sup> (A, C, E, and G) and *Tdr6*<sup>-/-</sup> (B, D, F, and H) testis sections for TNP1 (A and B), TNP2 (C and D), PRM1 (E and F), and PRM2 (G and H) counterstained with a Hoechst dye (blue). *Tdr6*<sup>-/-</sup> spermatids express transition proteins and protamines. Insets are higher magnification views showing nuclear localization of the proteins. (I and J) Anti-PRM1 and TNP2 double immunostaining of *Tdr6*<sup>+/-</sup> (I) and *Tdr6*<sup>-/-</sup> (J) elongating spermatids. Note that TNP2 in *Tdr6*<sup>-/-</sup> spermatids shows aberrant cytoplasmic aggregations (J, arrowheads) in addition to nuclear localization. (K–N) Immunostaining of *Tdr7*<sup>+/-</sup> (K), *Tdr7*<sup>-/-</sup> (L), *Tdr6*<sup>+/-</sup> (M), and *Tdr6*<sup>-/-</sup> (N) testis sections for germ-cell-specific nuclear antigen (GENA, red). Spermatogonia were normally seen in *Tdr7*<sup>-/-</sup> and *Tdr6*<sup>-/-</sup> testes (arrowheads). (O–R) Immunostaining of *Tdr7*<sup>+/-</sup> (O), *Tdr7*<sup>-/-</sup> (P), *Tdr6*<sup>+/-</sup> (Q), and *Tdr6*<sup>-/-</sup> (R) testis sections for SYCP3 (green). Axial elements in meiotic spermatocytes were normally observed in *Tdr7*<sup>-/-</sup> and *Tdr6*<sup>-/-</sup> mutants. (S–Z) Meiotic catastrophe of *Tdr1*<sup>-/-</sup> and *Tdr9*<sup>-/-</sup> mutants. *Tdr1*<sup>+/-</sup> (S and W), *Tdr1*<sup>-/-</sup> (T and X), *Tdr9*<sup>+/-</sup> (U and Y) and *Tdr9*<sup>-/-</sup> (V and Z) spermatocytes were immunostained for SYCP3 (S–V) or  $\gamma$ -H2AX (W–Z). In control *Tdr1*<sup>+/-</sup> and *Tdr9*<sup>+/-</sup> spermatocytes, meiotic synaptonemal complexes stained by SYCP3 were clearly assembled (S and U). In *Tdr1*<sup>-/-</sup> (T) and *Tdr9*<sup>-/-</sup> (V) mutants, such synapsis formation was severely disrupted.  $\gamma$ -H2AX is a marker for genome DNA double-strand breaks and was highly increased in *Tdr1*<sup>-/-</sup> (X) and *Tdr9*<sup>-/-</sup> (Z) spermatocytes (1, 2) compared with controls (W and Y). The nuclei were counterstained with a Hoechst dye (blue). (AA and AB) H&E-stained sections of *Tdr7*<sup>+/-</sup> (AA) and *Tdr7*<sup>-/-</sup> (AB) eyes (1 y). The eye lenses are indicated by open arrowheads. The region marked with an asterisk shows a cataract. There is another aberrant fiber cell mass adjoining the *Tdr7*<sup>-/-</sup> lens (AB). (Scale bars: A–H, 25  $\mu$ m; I–Z, 10  $\mu$ m; AA and AB, 500  $\mu$ m.)

- Shoji M, et al. (2009) The TDRD9-MIWI2 complex is essential for piRNA-mediated retrotransposon silencing in the mouse male germline. *Dev Cell* 17:775–787.
- Chuma S, et al. (2006) *Tdr1/Mtr-1*, a tudor-related gene, is essential for male germ-cell differentiation and nuage/germinal granule formation in mice. *Proc Natl Acad Sci USA* 103: 15894–15899.

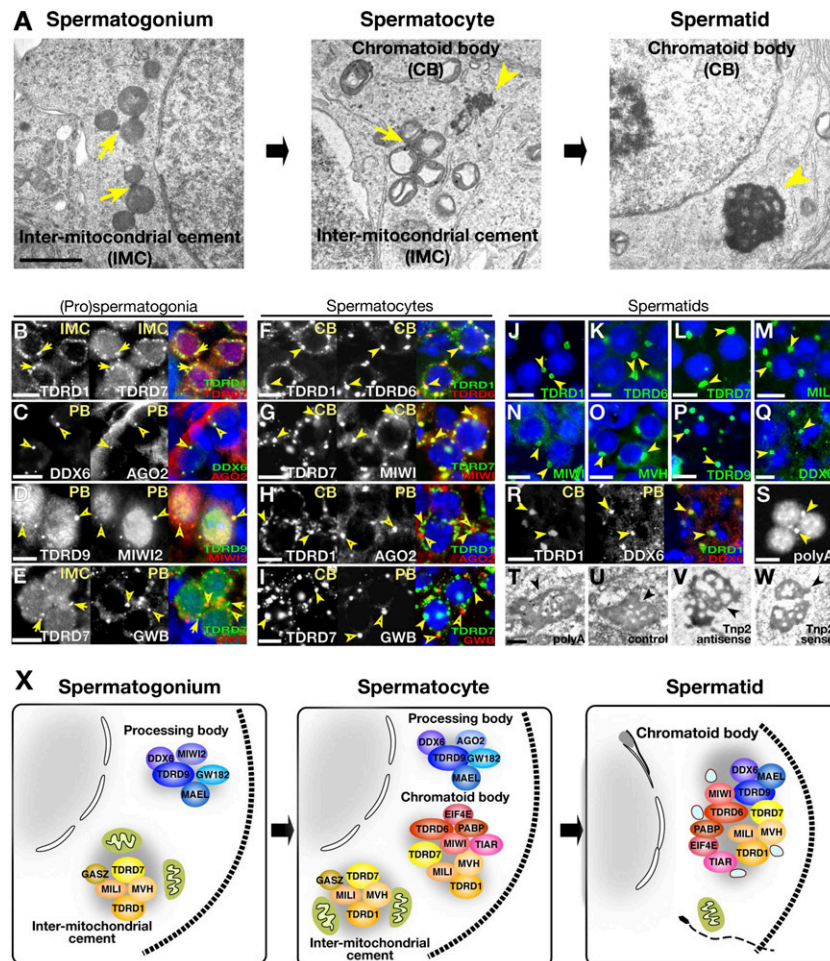

**Fig. 54.** Germinal granules in male germline development in mice. (A) Electron microscope images of germinal granules in murine male germ cells. In prospermatogonia (*Left*), intermitochondrial cement (arrows) is observed as small electron-dense material without limiting membranes among mitochondrial clusters. In meiotic spermatocytes (*Center*), the size and frequency of intermitochondrial cement increase (particularly at the pachytene stage, as shown by the arrow) compared with prospermatogonia. In the meantime, chromatoid bodies emerge independently of intermitochondrial cement and are observed as prominent, amorphous aggregates in the free cytoplasm (arrowhead). In haploid spermatids (*Right*), intermitochondrial cement is no longer seen, whereas chromatoid bodies (arrowhead) become more massive and are aggregated as a solitary architecture of submicron sizes. Chromatoid bodies at this stage occasionally show a close association with intracellular membrane vesicles. (B–E) Double immunostaining of fetal prospermatogonia at embryonic day 17.5 (B–E) and postnatal meiotic spermatocytes (F–I) with anti-TDRD1 and TDRD7 (markers of intermitochondrial cement and chromatoid bodies), anti-TDRD6 and MIWI (markers of chromatoid bodies), anti-DDX6, AGO2, TDRD9, MIWI2, and GWB proteins (markers of processing bodies/GW bodies) counterstained with a Hoechst dye (blue). Intermitochondrial cement, processing bodies, and chromatoid bodies are denoted by IMC, PB, and CB, respectively, and marked with arrows, open arrowheads, and arrowheads, respectively. (J–R) Immunostain (J–Q) and double immunostain (R) of round spermatids for chromatoid bodies. Chromatoid bodies at this stage integrate early chromatoid body proteins observed in meiotic spermatocytes (TDRD1, TDRD6, TDRD7, MILI, MIWI, and MVH) (J–O) with a class of processing body components (TDRD9, DDX6) (P and Q), resulting in a hybrid composition (R). The arrowheads indicate chromatoid bodies. (S) Fluorescence RNA in situ hybridization of round spermatids with an oligo(dT) probe. The arrowheads point to chromatoid bodies. (T–W) RNA in situ hybridization and electron microscopy of chromatoid bodies (arrowheads) for oligo(dT) (T), control oligo(dA) (U), *transition protein 2* (*Tnp2*) antisense (V), and control *Tnp2* sense (W) probes. Antisense signals (T and V, black dots) were seen at chromatoid bodies. (X) A summary for ribonucleoprotein (RNP) remodeling of germinal granules during male germline development. In prospermatogonia (*Left*), intermitochondrial cement and processing bodies are discrete subcellular compartments with different but related molecular compositions. In meiotic spermatocytes (*Center*), intermitochondrial cement, processing bodies, and early chromatoid bodies coexist independently of each other. Intermitochondrial cement and chromatoid bodies are structurally separate, but they share main components, whereas the latter contains additional subset of other RNP proteins (for detail, see *Results*, “*Tdrd7* regulates dynamic RNP remodeling of chromatoid bodies”). Then, in postmeiotic spermatids (*Right*), intermitochondrial cement disappears, whereas chromatoid bodies greatly increase in mass and integrate processing body components, resulting in a unique hybrid architecture of germline and ubiquitous RNPs. (Scale bars: A, 1  $\mu$ m; B–S, 10  $\mu$ m; T–W, 500 nm.)



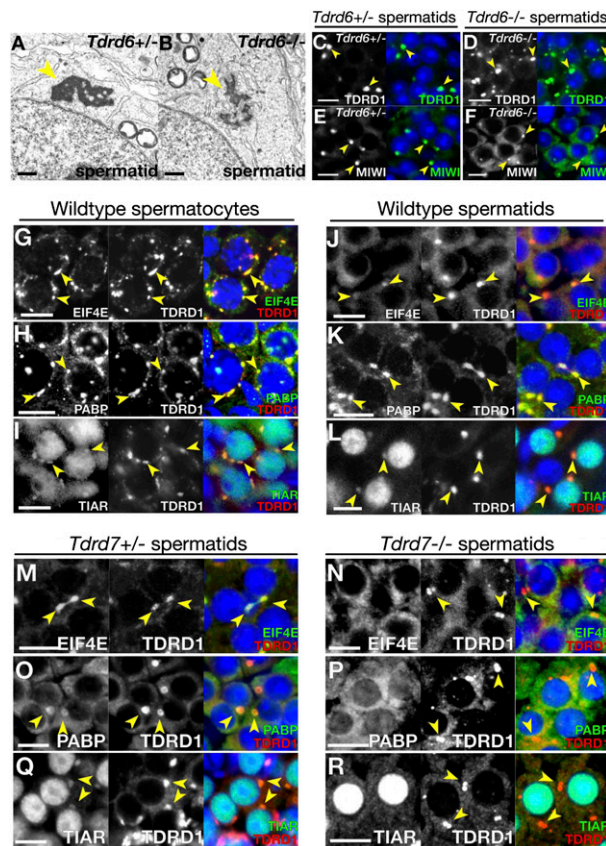

**Fig. S5.** (A and B) Electron microscopy of *Tdrd6*<sup>+/-</sup> (A) and *Tdrd6*<sup>-/-</sup> (B) spermatids. Chromatoid bodies (arrowheads) were fragmented and reduced in amount in *Tdrd6*<sup>-/-</sup> spermatids (B). (C–F) Immunostaining of *Tdrd6*<sup>+/-</sup> (C and E) and *Tdrd6*<sup>-/-</sup> (D and F) spermatids for TDRD1 (C and D) and MIWI (E and F). Nuclei were counterstained with a Hoechst dye (blue). (G–L) Double immunostain of meiotic spermatocytes (G–I) and haploid round spermatids (J–L) for EIF4E (G and J), PABPC1 (H and K), and TIAR (I and L), which are stress granule proteins (1, 2). Chromatoid bodies (identified with anti-TDRD1 antibody) are marked with arrowheads. (M–R) Double immunostain of *Tdrd7*<sup>+/-</sup> (M, O, and Q) and *Tdrd7*<sup>-/-</sup> (N, P, and R) spermatids for TDRD1 (chromatoid body marker) and EIF4E (M and N) and PABPC1 (O and P) and TIAR (Q and R). These translation regulators, which are also stress granule components, are delocalized from chromatoid bodies in *Tdrd7*<sup>-/-</sup> mutants. The arrowheads mark chromatoid bodies. (Scale bars: A and B, 500 nm; C–R, 10  $\mu$ m.)

1. Kedersha NL, Gupta M, Li W, Miller I, Anderson P (1999) RNA-binding proteins TIA-1 and TIAR link the phosphorylation of eIF-2 alpha to the assembly of mammalian stress granules. *J Cell Biol* 147:1431–1442.
2. Kedersha N, et al. (2002) Evidence that ternary complex (eIF2-GTP-tRNA(i)(Met))-deficient preinitiation complexes are core constituents of mammalian stress granules. *Mol Biol Cell* 13(1):195–210.





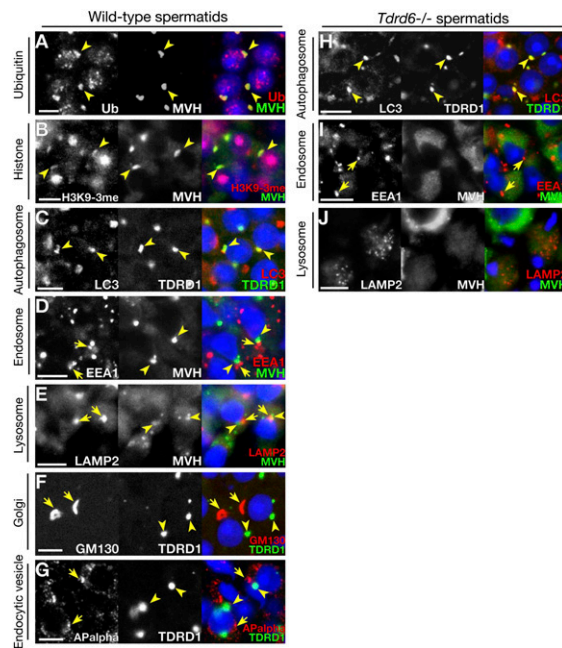

**Fig. S8.** Chromatoid bodies show a close spatiotemporal association with autophagosomes/lysosomes. Chromatoid bodies (A and B: MVH Center panels, arrowheads) at a late stage of spermatid differentiation exhibit the enrichment of ubiquitin (A, Ub) and the accumulation of unnecessary proteins like histones (B, H3K9-3me) as previously reported (1). Chromatoid bodies (C–G: TDRD1 and MVH Center panels, arrowheads) also show a close association with the autophagosomes (C, LC3), endosomes (D, EEA1), and lysosomes (E, LAMP2) during spermiogenesis. These characteristics (A–E) are hallmarks of aggresomes, the presumed function of which is to sequester unnecessary proteins and other cellular components, followed by in-cell clearance via the autophagy system. Chromatoid bodies may participate in intracellular protein turnover during spermatid morphogenesis, and in accordance, these aggresome-like features of chromatoid bodies were observed only at late stages of spermatid differentiation (after step 7), when substantial cell reconstruction takes place. Other endomembrane systems, including the Golgi apparatus (F, GM130, arrows) and endocytic vesicles (G, AP $\alpha$ , arrows), did not show a similar correlation with chromatoid bodies (arrowheads). In *Tdrd6*<sup>-/-</sup> spermatids (H–J), the initial contact between chromatoid bodies and autophagosomes were seen (H, arrowheads), but the subsequent association of chromatoid bodies with autophagosomes/lysosomes was not observed (I and J). Chromatoid bodies were dispersed by these differentiation stages in *Tdrd6*<sup>-/-</sup> spermatids. Nuclei were counterstained with a Hoechst dye (blue). (Scale bars: A–J, 10  $\mu$ m.)

1. Haraguchi CM, et al. (2005) Chromatoid bodies: Aggresome-like characteristics and degradation sites for organelles of spermiogenic cells. *J Histochem Cytochem* 53:455–465.

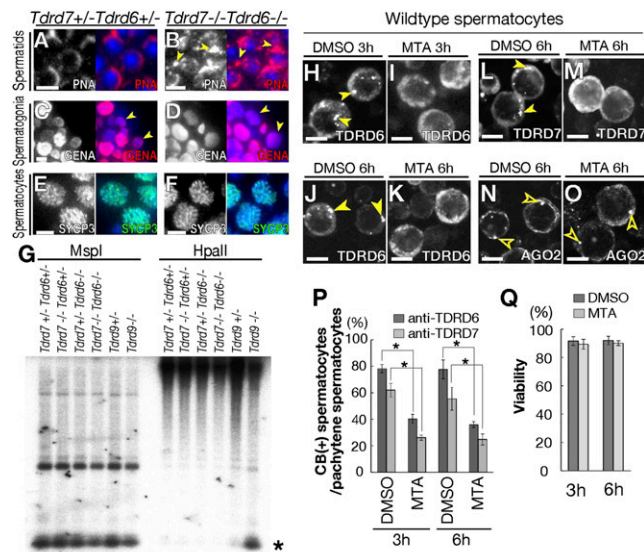

**Fig. S9.** (A and B) *Tdrd7<sup>+/+</sup> Tdrd6<sup>+/+</sup>* (A) and *Tdrd7<sup>-/-</sup> Tdrd6<sup>-/-</sup>* (B) spermatids stained for peanut agglutinin (PNA) (acrosome, red). In *Tdrd7<sup>-/-</sup> Tdrd6<sup>-/-</sup>* spermatids, acrosome formation was severely impaired (B, arrowheads). (C and D) Immunostaining of *Tdrd7<sup>+/+</sup> Tdrd6<sup>+/+</sup>* (C) and *Tdrd7<sup>-/-</sup> Tdrd6<sup>-/-</sup>* (D) testis sections for germ-cell-specific nuclear antigen (GENA, red). Spermatogonia (arrowheads) were normally seen in *Tdrd7<sup>-/-</sup> Tdrd6<sup>-/-</sup>* mutant testes (D) as in control *Tdrd7<sup>+/+</sup> Tdrd6<sup>+/+</sup>* testes (C). (E and F) Immunostaining of *Tdrd7<sup>+/+</sup> Tdrd6<sup>+/+</sup>* (E) and *Tdrd7<sup>-/-</sup> Tdrd6<sup>-/-</sup>* (F) testis sections for SYCP3 (green). Axial elements in meiotic spermatocytes were normally observed in *Tdrd7<sup>-/-</sup> Tdrd6<sup>-/-</sup>* mutant testes (F) as in controls (E). (G) Methylation-sensitive Southern blots of genomic DNA from postnatal day 22 testes of indicated genotypes probed with a *LINE1* probe. Genome DNAs were digested with methylation-sensitive HpaII or its methylation-insensitive isoschizomer MspI. The band marked with the asterisk on the HpaII blot indicates *LINE1* hypomethylation (seen only in the *Tdrd9<sup>-/-</sup>* lane, but not in the *Tdrd7<sup>-/-</sup> Tdrd6<sup>-/-</sup>* lane). (H–Q) Primary culture of wild-type testis cells. DMSO- or MTA-treated spermatocytes were immunostained for TDRD6, TDRD7 (chromatoid bodies: arrowheads, H–M), or AGO2 (processing bodies: open arrowheads, N and O). (P) Quantification of spermatocytes (identified by SYCP3;  $n = 150$ ) with chromatoid bodies (CB) (identified by using anti-TDRD6 and anti-TDRD7 antibodies). Asterisk,  $P < 0.01$ . (Q) Cell viability during the time course of primary culture as shown in P. Spermatocytes with normal nuclear morphologies (stained by a Hoechst dye) and SYCP3 patterns were counted ( $n = 150$ , means and SE). (Scale bars: A–F and H–O, 10  $\mu\text{m}$ .)
